# Supplementary material
Source: publisher site journal article supplement (https://vertebrate-zoology.arphahub.com/article/90979/download/suppl/34/)
Supplement: Supplementary file 1

## Sheet: tukey_CaS
Table S3. Summary statistics from the ANOVA and TukeyHSD post hoc analyses of the meristic data.
CaS	diff	lwr	upr	p adj		CS	diff	lwr	upr	p adj		ET	diff	lwr	upr	p adj		FS	diff	lwr	upr	p adj
hitihamii-alwisi	7.5	6.22499	8.77501	5.86198e-14		nilgala-alwisi	1	0.0261967	1.9738	0.0400665		gunasekarai-alwisi	-3.25	-5.77108	-0.728925	0.00381134		gunawardanai-alwisi	-1.125	-2.12172	-0.128281	0.0166734
jayaweerai-alwisi	1.375	0.0999922	2.65001	0.025891		hitihamii-gunasekarai	-1	-1.9738	-0.0261967	0.0400665		gunawardanai-alwisi	3.5	0.978925	6.02108	0.00147217		jayaweerai-alwisi	1.75	0.753281	2.74672	3.87987e-05
kohukumburai-alwisi	3.625	2.34999	4.90001	1.34856e-09		kohukumburai-gunasekarai	-1	-1.9738	-0.0261967	0.0400665		hitihamii-alwisi	-5.375	-7.89608	-2.85392	9.50092e-07		kohukumburai-alwisi	2.875	1.87828	3.87172	9.42445e-10
nanayakkarai-alwisi	1.875	0.599992	3.15001	0.000658945		nilgala-gunawardanai	1.5	0.526197	2.4738	0.000330979		nilgala-alwisi	-5.125	-7.64608	-2.60392	2.49804e-06		punctata-alwisi	7.375	6.37828	8.37172	5.86198e-14
rammalensis-alwisi	7	5.72499	8.27501	5.86198e-14		punctata-gunawardanai	8.88178e-16	-0.973803	0.973803	1		punctata-alwisi	-6	-8.52108	-3.47892	8.91183e-08		rajakarunai-alwisi	1.5	0.503281	2.49672	0.000469751
hitihamii-gunasekarai	6.875	5.59999	8.15001	5.86198e-14		nanayakkarai-hitihamii	1	0.0261967	1.9738	0.0400665		rajakarunai-alwisi	-4.875	-7.39608	-2.35392	6.62856e-06		gunawardanai-gunasekarai	-1	-1.99672	-0.00328053	0.0486758
kohukumburai-gunasekarai	3	1.72499	4.27501	1.14888e-07		nilgala-hitihamii	1.75	0.776197	2.7238	2.57102e-05		rammalensis-alwisi	5.5	2.97892	8.02108	5.88269e-07		jayaweerai-gunasekarai	1.875	0.878281	2.87172	1.11487e-05
rajakarunai-gunasekarai	-1.75	-3.02501	-0.474992	0.00171486		nilgala-jayaweerai	1	0.0261967	1.9738	0.0400665		gunawardanai-gunasekarai	6.75	4.22892	9.27108	5.82041e-09		kohukumburai-gunasekarai	3	2.00328	3.99672	3.23e-10
rammalensis-gunasekarai	6.375	5.09999	7.65001	5.88418e-14		nanayakkarai-kohukumburai	1	0.0261967	1.9738	0.0400665		kohukumburai-gunasekarai	3.875	1.35392	6.39608	0.000342005		nanayakkarai-gunasekarai	1	0.00328053	1.99672	0.0486758
hitihamii-gunawardanai	6.25	4.97499	7.52501	5.90639e-14		nilgala-kohukumburai	1.75	0.776197	2.7238	2.57102e-05		nanayakkarai-gunasekarai	0.75	-1.77108	3.27108	0.99297		punctata-gunasekarai	7.5	6.50328	8.49672	5.86198e-14
kohukumburai-gunawardanai	2.375	1.09999	3.65001	1.33862e-05		punctata-nilgala	-1.5	-2.4738	-0.526197	0.000330979		punctata-gunasekarai	-2.75	-5.27108	-0.228925	0.0232602		rajakarunai-gunasekarai	1.625	0.628281	2.62172	0.000135388
punctata-gunawardanai	-1.875	-3.15001	-0.599992	0.000658945		rajakarunai-nilgala	-1	-1.9738	-0.0261967	0.0400665		rajakarunai-gunasekarai	-1.625	-4.14608	0.896075	0.504031		hitihamii-gunawardanai	1	0.00328053	1.99672	0.0486758
rajakarunai-gunawardanai	-2.375	-3.65001	-1.09999	1.33862e-05		rammalensis-nilgala	-1	-1.9738	-0.0261967	0.0400665		rammalensis-gunasekarai	8.75	6.22892	11.2711	7.77711e-12		jayaweerai-gunawardanai	2.875	1.87828	3.87172	9.42445e-10
rammalensis-gunawardanai	5.75	4.47499	7.02501	6.41709e-14								hitihamii-gunawardanai	-8.875	-11.3961	-6.35392	5.32474e-12		kohukumburai-gunawardanai	4	3.00328	4.99672	2.04503e-13
jayaweerai-hitihamii	-6.125	-7.40001	-4.84999	5.9619e-14		IN	diff	lwr	upr	p adj		jayaweerai-gunawardanai	-5.625	-8.14608	-3.10392	3.65292e-07		nanayakkarai-gunawardanai	2	1.00328	2.99672	3.2327e-06
kohukumburai-hitihamii	-3.875	-5.15001	-2.59999	2.5233e-10		nanayakkarai-alwisi	2	1.63194	2.36806	5.86198e-14		kohukumburai-gunawardanai	-2.875	-5.39608	-0.353925	0.015026		punctata-gunawardanai	8.5	7.50328	9.49672	5.86198e-14
nanayakkarai-hitihamii	-5.625	-6.90001	-4.34999	6.90559e-14		nanayakkarai-gunasekarai	2	1.63194	2.36806	5.86198e-14		nanayakkarai-gunawardanai	-6	-8.52108	-3.47892	8.91183e-08		rajakarunai-gunawardanai	2.625	1.62828	3.62172	8.62635e-09
nilgala-hitihamii	-7.125	-8.40001	-5.84999	5.86198e-14		nanayakkarai-gunawardanai	2	1.63194	2.36806	5.86198e-14		nilgala-gunawardanai	-8.625	-11.1461	-6.10392	1.14222e-11		jayaweerai-hitihamii	1.875	0.878281	2.87172	1.11487e-05
punctata-hitihamii	-8.125	-9.40001	-6.84999	5.86198e-14		nanayakkarai-hitihamii	2	1.63194	2.36806	5.86198e-14		punctata-gunawardanai	-9.5	-12.0211	-6.97892	8.82294e-13		kohukumburai-hitihamii	3	2.00328	3.99672	3.23e-10
rajakarunai-hitihamii	-8.625	-9.90001	-7.34999	5.86198e-14		nanayakkarai-jayaweerai	2	1.63194	2.36806	5.86198e-14		rajakarunai-gunawardanai	-8.375	-10.8961	-5.85392	2.49554e-11		nanayakkarai-hitihamii	1	0.00328053	1.99672	0.0486758
kohukumburai-jayaweerai	2.25	0.974992	3.52501	3.54939e-05		nanayakkarai-kohukumburai	2	1.63194	2.36806	5.86198e-14		jayaweerai-hitihamii	3.25	0.728925	5.77108	0.00381134		punctata-hitihamii	7.5	6.50328	8.49672	5.86198e-14
punctata-jayaweerai	-2	-3.27501	-0.724992	0.000250093		nilgala-nanayakkarai	-2	-2.36806	-1.63194	5.86198e-14		kohukumburai-hitihamii	6	3.47892	8.52108	8.91183e-08		rajakarunai-hitihamii	1.625	0.628281	2.62172	0.000135388
rajakarunai-jayaweerai	-2.5	-3.77501	-1.22499	5.07414e-06		punctata-nanayakkarai	-1.75	-2.11806	-1.38194	6.00631e-14		nanayakkarai-hitihamii	2.875	0.353925	5.39608	0.015026		kohukumburai-jayaweerai	1.125	0.128281	2.12172	0.0166734
rammalensis-jayaweerai	5.625	4.34999	6.90001	6.90559e-14		rajakarunai-nanayakkarai	-2	-2.36806	-1.63194	5.86198e-14		rammalensis-hitihamii	10.875	8.35392	13.3961	7.89369e-14		nanayakkarai-jayaweerai	-0.875	-1.87172	0.121719	0.127774
nanayakkarai-kohukumburai	-1.75	-3.02501	-0.474992	0.00171486		rammalensis-nanayakkarai	-2	-2.36806	-1.63194	5.86198e-14		kohukumburai-jayaweerai	2.75	0.228925	5.27108	0.0232602		nilgala-jayaweerai	-2.5	-3.49672	-1.50328	2.70445e-08
nilgala-kohukumburai	-3.25	-4.52501	-1.97499	1.86048e-08								nilgala-jayaweerai	-3	-5.52108	-0.478925	0.00959874		punctata-jayaweerai	5.625	4.62828	6.62172	5.86198e-14
punctata-kohukumburai	-4.25	-5.52501	-2.97499	2.28061e-11		PM	diff	lwr	upr	p adj		punctata-jayaweerai	-3.875	-6.39608	-1.35392	0.000342005		rammalensis-jayaweerai	-2.125	-3.12172	-1.12828	9.50394e-07
rajakarunai-kohukumburai	-4.75	-6.02501	-3.47499	1.18683e-12		gunasekarai-alwisi	0.75	0.0138739	1.48613	0.0428346		rajakarunai-jayaweerai	-2.75	-5.27108	-0.228925	0.0232602		nanayakkarai-kohukumburai	-2	-2.99672	-1.00328	3.2327e-06
rammalensis-kohukumburai	3.375	2.09999	4.65001	7.64528e-09		gunawardanai-alwisi	0.75	0.0138739	1.48613	0.0428346		rammalensis-jayaweerai	7.625	5.10392	10.1461	2.85518e-10		nilgala-kohukumburai	-3.625	-4.62172	-2.62828	2.23366e-12
nilgala-nanayakkarai	-1.5	-2.77501	-0.224992	0.0108559		hitihamii-alwisi	0.75	0.0138739	1.48613	0.0428346		nanayakkarai-kohukumburai	-3.125	-5.64608	-0.603925	0.00607321		punctata-kohukumburai	4.5	3.50328	5.49672	6.39488e-14
punctata-nanayakkarai	-2.5	-3.77501	-1.22499	5.07414e-06		jayaweerai-alwisi	0.75	0.0138739	1.48613	0.0428346		nilgala-kohukumburai	-5.75	-8.27108	-3.22892	2.27522e-07		rajakarunai-kohukumburai	-1.375	-2.37172	-0.378281	0.00160279
rajakarunai-nanayakkarai	-3	-4.27501	-1.72499	1.14888e-07		kohukumburai-alwisi	0.75	0.0138739	1.48613	0.0428346		punctata-kohukumburai	-6.625	-9.14608	-4.10392	9.0892e-09		rammalensis-kohukumburai	-3.25	-4.24672	-2.25328	4.07719e-11
rammalensis-nanayakkarai	5.125	3.84999	6.40001	1.98952e-13		nanayakkarai-alwisi	1.75	1.01387	2.48613	9.13431e-08		rajakarunai-kohukumburai	-5.5	-8.02108	-2.97892	5.88269e-07		nilgala-nanayakkarai	-1.625	-2.62172	-0.628281	0.000135388
rajakarunai-nilgala	-1.5	-2.77501	-0.224992	0.0108559		nilgala-alwisi	0.75	0.0138739	1.48613	0.0428346		rammalensis-kohukumburai	4.875	2.35392	7.39608	6.62856e-06		punctata-nanayakkarai	6.5	5.50328	7.49672	5.86198e-14
rammalensis-nilgala	6.625	5.34999	7.90001	5.87308e-14		rajakarunai-alwisi	2	1.26387	2.73613	4.09177e-09		nilgala-nanayakkarai	-2.625	-5.14608	-0.103925	0.0355434		rammalensis-nanayakkarai	-1.25	-2.24672	-0.253281	0.00530062
rammalensis-punctata	7.625	6.34999	8.90001	5.86198e-14		rammalensis-alwisi	2	1.26387	2.73613	4.09177e-09		punctata-nanayakkarai	-3.5	-6.02108	-0.978925	0.00147217		punctata-nilgala	8.125	7.12828	9.12172	5.86198e-14
rammalensis-rajakarunai	8.125	6.84999	9.40001	5.86198e-14		nanayakkarai-gunasekarai	1	0.263874	1.73613	0.00196454		rammalensis-nanayakkarai	8	5.47892	10.5211	8.29914e-11		rajakarunai-nilgala	2.25	1.25328	3.24672	2.84289e-07
						punctata-gunasekarai	-0.75	-1.48613	-0.0138739	0.0428346		rammalensis-nilgala	10.625	8.10392	13.1461	9.67004e-14		rajakarunai-punctata	-5.875	-6.87172	-4.87828	5.86198e-14
IL	diff	lwr	upr	p adj		rajakarunai-gunasekarai	1.25	0.513874	1.98613	6.89455e-05		rammalensis-punctata	11.5	8.97892	14.0211	6.27276e-14		rammalensis-punctata	-7.75	-8.74672	-6.75328	5.86198e-14
nilgala-alwisi	-1.375	-2.58215	-0.16785	0.0152068		rammalensis-gunasekarai	1.25	0.513874	1.98613	6.89455e-05		rammalensis-rajakarunai	10.375	7.85392	12.8961	1.30895e-13		rammalensis-rajakarunai	-1.875	-2.87172	-0.878281	1.11487e-05
rajakarunai-alwisi	1.55	0.34285	2.75715	0.0040004		nanayakkarai-gunawardanai	1	0.263874	1.73613	0.00196454
nanayakkarai-gunasekarai	-1.375	-2.58215	-0.16785	0.0152068		punctata-gunawardanai	-0.75	-1.48613	-0.0138739	0.0428346		IS	diff	lwr	upr	p adj		MS	diff	lwr	upr	p adj
nilgala-gunasekarai	-1.875	-3.08215	-0.66785	0.000291285		rajakarunai-gunawardanai	1.25	0.513874	1.98613	6.89455e-05		kohukumburai-alwisi	9.25	4.11467	14.3853	2.46646e-05		gunasekarai-alwisi	17.75	8.43623	27.0638	8.73641e-06
nilgala-gunawardanai	-1.625	-2.83215	-0.41785	0.00221185		rammalensis-gunawardanai	1.25	0.513874	1.98613	6.89455e-05		nanayakkarai-alwisi	-0.25	-5.38533	4.88533	1		gunawardanai-alwisi	22.5	13.1862	31.8138	6.37183e-08
rajakarunai-gunawardanai	1.3	0.0928504	2.50715	0.0262296		nanayakkarai-hitihamii	1	0.263874	1.73613	0.00196454		nilgala-alwisi	0	-5.13533	5.13533	1		hitihamii-alwisi	23.5	14.1862	32.8138	2.35787e-08
nilgala-hitihamii	-1.25	-2.45715	-0.0428504	0.0372925		punctata-hitihamii	-0.75	-1.48613	-0.0138739	0.0428346		punctata-alwisi	-3.25	-8.38533	1.88533	0.530007		kohukumburai-alwisi	10	0.686235	19.3138	0.0269706
punctata-hitihamii	0.125	-1.08215	1.33215	0.999999		rajakarunai-hitihamii	1.25	0.513874	1.98613	6.89455e-05		rajakarunai-alwisi	8.5	3.36467	13.6353	0.000105703		nanayakkarai-alwisi	17	7.68623	26.3138	1.94249e-05
rajakarunai-hitihamii	1.675	0.46785	2.88215	0.00148263		rammalensis-hitihamii	1.25	0.513874	1.98613	6.89455e-05		rammalensis-alwisi	13.75	8.61467	18.8853	5.81505e-09		rammalensis-alwisi	51.75	42.4362	61.0638	5.86198e-14
rammalensis-hitihamii	0.5	-0.70715	1.70715	0.931518		nanayakkarai-jayaweerai	1	0.263874	1.73613	0.00196454		hitihamii-gunasekarai	5.75	0.614674	10.8853	0.018058		jayaweerai-gunasekarai	-18.75	-28.0638	-9.43623	3.03084e-06
rajakarunai-jayaweerai	1.925	0.71785	3.13215	0.000193083		punctata-jayaweerai	-0.75	-1.48613	-0.0138739	0.0428346		kohukumburai-gunasekarai	13.5	8.36467	18.6353	9.00732e-09		nilgala-gunasekarai	-17	-26.3138	-7.68623	1.94249e-05
rammalensis-jayaweerai	0.75	-0.45715	1.95715	0.555927		rajakarunai-jayaweerai	1.25	0.513874	1.98613	6.89455e-05		rajakarunai-gunasekarai	12.75	7.61467	17.8853	3.41909e-08		punctata-gunasekarai	-16.75	-26.0638	-7.43623	2.53706e-05
nilgala-kohukumburai	-0.75	-1.95715	0.45715	0.555927		rammalensis-jayaweerai	1.25	0.513874	1.98613	6.89455e-05		rammalensis-gunasekarai	18	12.8647	23.1353	5.97744e-12		rajakarunai-gunasekarai	-17.5	-26.8138	-8.18623	1.13982e-05
rajakarunai-kohukumburai	2.175	0.96785	3.38215	2.45382e-05		nanayakkarai-kohukumburai	1	0.263874	1.73613	0.00196454		kohukumburai-gunawardanai	10.5	5.36467	15.6353	2.22549e-06		rammalensis-gunasekarai	34	24.6862	43.3138	2.02116e-12
rajakarunai-nanayakkarai	2.425	1.21785	3.63215	3.16106e-06		punctata-kohukumburai	-0.75	-1.48613	-0.0138739	0.0428346		rajakarunai-gunawardanai	9.75	4.61467	14.8853	9.37902e-06		jayaweerai-gunawardanai	-23.5	-32.8138	-14.1862	2.35787e-08
rammalensis-nanayakkarai	1.25	0.0428504	2.45715	0.0372925		rajakarunai-kohukumburai	1.25	0.513874	1.98613	6.89455e-05		rammalensis-gunawardanai	15	9.86467	20.1353	6.88486e-10		kohukumburai-gunawardanai	-12.5	-21.8138	-3.18623	0.00229955
punctata-nilgala	1.375	0.16785	2.58215	0.0152068		rammalensis-kohukumburai	1.25	0.513874	1.98613	6.89455e-05		kohukumburai-hitihamii	7.75	2.61467	12.8853	0.000450595		nilgala-gunawardanai	-21.75	-31.0638	-12.4362	1.35732e-07
rajakarunai-nilgala	2.925	1.71785	4.13215	5.95316e-08		nilgala-nanayakkarai	-1	-1.73613	-0.263874	0.00196454		rajakarunai-hitihamii	7	1.86467	12.1353	0.00187848		punctata-gunawardanai	-21.5	-30.8138	-12.1862	1.74986e-07
rammalensis-nilgala	1.75	0.54285	2.95715	0.000808864		punctata-nanayakkarai	-1.75	-2.48613	-1.01387	9.13431e-08		rammalensis-hitihamii	12.25	7.11467	17.3853	8.46361e-08		rajakarunai-gunawardanai	-22.25	-31.5638	-12.9362	8.19044e-08
rajakarunai-punctata	1.55	0.34285	2.75715	0.0040004		punctata-nilgala	-0.75	-1.48613	-0.0138739	0.0428346		kohukumburai-jayaweerai	12	6.86467	17.1353	1.3382e-07		rammalensis-gunawardanai	29.25	19.9362	38.5638	1.08614e-10
						rajakarunai-nilgala	1.25	0.513874	1.98613	6.89455e-05		rajakarunai-jayaweerai	11.25	6.11467	16.3853	5.38895e-07		jayaweerai-hitihamii	-24.5	-33.8138	-15.1862	8.87295e-09
MVS	diff	lwr	upr	p adj		rammalensis-nilgala	1.25	0.513874	1.98613	6.89455e-05		rammalensis-jayaweerai	16.5	11.3647	21.6353	5.99699e-11		kohukumburai-hitihamii	-13.5	-22.8138	-4.18623	0.000810678
gunasekarai-alwisi	-25.5	-41.5139	-9.48608	0.000197549		rajakarunai-punctata	2	1.26387	2.73613	4.09177e-09		nanayakkarai-kohukumburai	-9.5	-14.6353	-4.36467	1.52006e-05		nilgala-hitihamii	-22.75	-32.0638	-13.4362	4.96202e-08
jayaweerai-alwisi	-23.25	-39.2639	-7.23608	0.000791868		rammalensis-punctata	2	1.26387	2.73613	4.09177e-09		nilgala-kohukumburai	-9.25	-14.3853	-4.11467	2.46646e-05		punctata-hitihamii	-22.5	-31.8138	-13.1862	6.37183e-08
kohukumburai-alwisi	-15.75	-31.7639	0.263916	0.0571288								punctata-kohukumburai	-12.5	-17.6353	-7.36467	5.37041e-08		rajakarunai-hitihamii	-23.25	-32.5638	-13.9362	3.01843e-08
nanayakkarai-alwisi	-29.5	-45.5139	-13.4861	1.64226e-05		SL	diff	lwr	upr	p adj		rajakarunai-nanayakkarai	8.75	3.61467	13.8853	6.50688e-05		rammalensis-hitihamii	28.25	18.9362	37.5638	2.65495e-10
nilgala-alwisi	-22.75	-38.7639	-6.73608	0.00107471		nilgala-alwisi	-1.75	-3.11067	-0.389328	0.00392126		rammalensis-nanayakkarai	14	8.86467	19.1353	3.76763e-09		kohukumburai-jayaweerai	11	1.68623	20.3138	0.0104126
rammalensis-alwisi	46	29.9861	62.0139	1.0451e-09		hitihamii-gunasekarai	-1.375	-2.73567	-0.0143277	0.0458738		rajakarunai-nilgala	8.5	3.36467	13.6353	0.000105703		nanayakkarai-jayaweerai	18	8.68623	27.3138	6.69937e-06
gunawardanai-gunasekarai	37.75	21.7361	53.7639	1.10226e-07		jayaweerai-gunasekarai	-1.625	-2.98567	-0.264328	0.00922895		rammalensis-nilgala	13.75	8.61467	18.8853	5.81505e-09		rammalensis-jayaweerai	52.75	43.4362	62.0638	5.86198e-14
rajakarunai-gunasekarai	39.5	23.4861	55.5139	3.97185e-08		kohukumburai-gunasekarai	-1.75	-3.11067	-0.389328	0.00392126		rajakarunai-punctata	11.75	6.61467	16.8853	2.12259e-07		rammalensis-kohukumburai	41.75	32.4362	51.0638	6.52811e-14
rammalensis-gunasekarai	71.5	55.4861	87.5139	6.58362e-14		nanayakkarai-gunasekarai	-2	-3.36067	-0.639328	0.000663609		rammalensis-punctata	17	11.8647	22.1353	2.73728e-11		nilgala-nanayakkarai	-16.25	-25.5638	-6.93623	4.33066e-05
hitihamii-gunawardanai	-27.5	-43.5139	-11.4861	5.69481e-05		nilgala-gunasekarai	-2.5	-3.86067	-1.13933	1.72e-05		rammalensis-rajakarunai	5.25	0.114674	10.3853	0.0416168		punctata-nanayakkarai	-16	-25.3138	-6.68623	5.65911e-05
jayaweerai-gunawardanai	-35.5	-51.5139	-19.4861	4.19254e-07		rammalensis-nanayakkarai	1.375	0.0143277	2.73567	0.0458738								rajakarunai-nanayakkarai	-16.75	-26.0638	-7.43623	2.53706e-05
kohukumburai-gunawardanai	-28	-44.0139	-11.9861	4.17181e-05		punctata-nilgala	1.5	0.139328	2.86067	0.0210242		PN	diff	lwr	upr	p adj		rammalensis-nanayakkarai	34.75	25.4362	44.0638	1.14109e-12
nanayakkarai-gunawardanai	-41.75	-57.7639	-25.7361	1.0964e-08		rajakarunai-nilgala	1.375	0.0143277	2.73567	0.0458738		gunasekarai-alwisi	-1	-1.18403	-0.815968	5.86198e-14		rammalensis-nilgala	51	41.6862	60.3138	5.86198e-14
nilgala-gunawardanai	-35	-51.0139	-18.9861	5.66076e-07		rammalensis-nilgala	1.875	0.514328	3.23567	0.00162671		hitihamii-alwisi	-1	-1.18403	-0.815968	5.86198e-14		rammalensis-punctata	50.75	41.4362	60.0638	5.86198e-14
punctata-gunawardanai	-27.25	-43.2639	-11.2361	6.65374e-05								jayaweerai-alwisi	-1	-1.18403	-0.815968	5.86198e-14		rammalensis-rajakarunai	51.5	42.1862	60.8138	5.86198e-14
rammalensis-gunawardanai	33.75	17.7361	49.7639	1.20508e-06		SN	diff	lwr	upr	p adj		kohukumburai-alwisi	-1	-1.18403	-0.815968	5.86198e-14
rajakarunai-hitihamii	29.25	13.2361	45.2639	1.91791e-05		punctata-alwisi	-0.375	-0.727394	-0.0226065	0.0292653		nanayakkarai-alwisi	-1	-1.18403	-0.815968	5.86198e-14		PV	diff	lwr	upr	p adj
rammalensis-hitihamii	61.25	45.2361	77.2639	6.06182e-13		punctata-gunasekarai	-0.375	-0.727394	-0.0226065	0.0292653		nilgala-alwisi	-1	-1.18403	-0.815968	5.86198e-14		gunasekarai-alwisi	28	20.502	35.498	1.11511e-12
rajakarunai-jayaweerai	37.25	21.2361	53.2639	1.47995e-07		punctata-gunawardanai	-0.375	-0.727394	-0.0226065	0.0292653		punctata-alwisi	-1	-1.18403	-0.815968	5.86198e-14		gunawardanai-alwisi	59.5	52.002	66.998	5.86198e-14
rammalensis-jayaweerai	69.25	53.2361	85.2639	7.76046e-14		punctata-hitihamii	-0.375	-0.727394	-0.0226065	0.0292653		gunawardanai-gunasekarai	1	0.815968	1.18403	5.86198e-14		hitihamii-alwisi	53	45.502	60.498	5.86198e-14
rajakarunai-kohukumburai	29.75	13.7361	45.7639	1.40638e-05		punctata-jayaweerai	-0.375	-0.727394	-0.0226065	0.0292653		rajakarunai-gunasekarai	0.875	0.690968	1.05903	6.00631e-14		jayaweerai-alwisi	31.25	23.752	38.748	1.10245e-13
rammalensis-kohukumburai	61.75	45.7361	77.7639	4.95493e-13		punctata-kohukumburai	-0.375	-0.727394	-0.0226065	0.0292653		rammalensis-gunasekarai	1	0.815968	1.18403	5.86198e-14		kohukumburai-alwisi	62.25	54.752	69.748	5.86198e-14
rajakarunai-nanayakkarai	43.5	27.4861	59.5139	4.1114e-09		punctata-nanayakkarai	-0.375	-0.727394	-0.0226065	0.0292653		hitihamii-gunawardanai	-1	-1.18403	-0.815968	5.86198e-14		nanayakkarai-alwisi	34	26.502	41.498	6.35048e-14
rammalensis-nanayakkarai	75.5	59.4861	91.5139	6.06182e-14		punctata-nilgala	-0.375	-0.727394	-0.0226065	0.0292653		jayaweerai-gunawardanai	-1	-1.18403	-0.815968	5.86198e-14		nilgala-alwisi	90	82.502	97.498	5.86198e-14
rajakarunai-nilgala	36.75	20.7361	52.7639	1.98964e-07		rajakarunai-punctata	0.375	0.0226065	0.727394	0.0292653		kohukumburai-gunawardanai	-1	-1.18403	-0.815968	5.86198e-14		punctata-alwisi	-5.75	-13.248	1.74801	0.266183
rammalensis-nilgala	68.75	52.7361	84.7639	8.21565e-14		rammalensis-punctata	0.375	0.0226065	0.727394	0.0292653		nanayakkarai-gunawardanai	-1	-1.18403	-0.815968	5.86198e-14		rajakarunai-alwisi	-9.75	-17.248	-2.25199	0.00342682
rajakarunai-punctata	29	12.9861	45.0139	2.24006e-05								nilgala-gunawardanai	-1	-1.18403	-0.815968	5.86198e-14		gunawardanai-gunasekarai	31.5	24.002	38.998	1.00364e-13
rammalensis-punctata	61	44.9861	77.0139	6.71241e-13		TFL1	diff	lwr	upr	p adj		punctata-gunawardanai	-1	-1.18403	-0.815968	5.86198e-14		hitihamii-gunasekarai	25	17.502	32.498	2.26428e-11
rammalensis-rajakarunai	32	15.9861	48.0139	3.50809e-06		gunawardanai-alwisi	3.75	2.65093	4.84907	1.22706e-11		rajakarunai-hitihamii	0.875	0.690968	1.05903	6.00631e-14		kohukumburai-gunasekarai	34.25	26.752	41.748	6.26166e-14
						hitihamii-alwisi	2.5	1.40093	3.59907	2.41157e-07		rammalensis-hitihamii	1	0.815968	1.18403	5.86198e-14		nilgala-gunasekarai	62	54.502	69.498	5.86198e-14
SC	diff	lwr	upr	p adj		kohukumburai-alwisi	1.5	0.400935	2.59907	0.0018481		rajakarunai-jayaweerai	0.875	0.690968	1.05903	6.00631e-14		punctata-gunasekarai	-33.75	-41.248	-26.252	6.4504e-14
gunasekarai-alwisi	-3.625	-5.44061	-1.80939	3.56686e-06		nanayakkarai-alwisi	1.25	0.150935	2.34907	0.0154415		rammalensis-jayaweerai	1	0.815968	1.18403	5.86198e-14		rajakarunai-gunasekarai	-37.75	-45.248	-30.252	5.88418e-14
hitihamii-alwisi	2	0.184388	3.81561	0.0211791		nilgala-alwisi	1.25	0.150935	2.34907	0.0154415		rajakarunai-kohukumburai	0.875	0.690968	1.05903	6.00631e-14		rammalensis-gunasekarai	-25.5	-32.998	-18.002	1.33801e-11
kohukumburai-alwisi	1	-0.815612	2.81561	0.711871		punctata-alwisi	1.875	0.775935	2.97407	6.37137e-05		rammalensis-kohukumburai	1	0.815968	1.18403	5.86198e-14		jayaweerai-gunawardanai	-28.25	-35.748	-20.752	8.85736e-13
nanayakkarai-alwisi	2.5	0.684388	4.31561	0.00164331		rajakarunai-alwisi	1.25	0.150935	2.34907	0.0154415		rajakarunai-nanayakkarai	0.875	0.690968	1.05903	6.00631e-14		nanayakkarai-gunawardanai	-25.5	-32.998	-18.002	1.33801e-11
nilgala-alwisi	2.25	0.434388	4.06561	0.00609014		rammalensis-alwisi	6.25	5.15093	7.34907	5.86198e-14		rammalensis-nanayakkarai	1	0.815968	1.18403	5.86198e-14		nilgala-gunawardanai	30.5	23.002	37.998	1.5854e-13
punctata-alwisi	3.625	1.80939	5.44061	3.56686e-06		gunawardanai-gunasekarai	3.25	2.15093	4.34907	5.05564e-10		rajakarunai-nilgala	0.875	0.690968	1.05903	6.00631e-14		punctata-gunawardanai	-65.25	-72.748	-57.752	5.86198e-14
rajakarunai-alwisi	-3.375	-5.19061	-1.55939	1.39086e-05		hitihamii-gunasekarai	2	0.900935	3.09907	2.05225e-05		rammalensis-nilgala	1	0.815968	1.18403	5.86198e-14		rajakarunai-gunawardanai	-69.25	-76.748	-61.752	5.86198e-14
rammalensis-alwisi	4	2.18439	5.81561	4.7826e-07		punctata-gunasekarai	1.375	0.275935	2.47407	0.00545419		rajakarunai-punctata	0.875	0.690968	1.05903	6.00631e-14		rammalensis-gunawardanai	-57	-64.498	-49.502	5.86198e-14
gunawardanai-gunasekarai	4.875	3.05939	6.69061	5.43704e-09		rammalensis-gunasekarai	5.75	4.65093	6.84907	5.87308e-14		rammalensis-punctata	1	0.815968	1.18403	5.86198e-14		jayaweerai-hitihamii	-21.75	-29.248	-14.252	8.1884e-10
hitihamii-gunasekarai	5.625	3.80939	7.44061	1.5424e-10		hitihamii-gunawardanai	-1.25	-2.34907	-0.150935	0.0154415								kohukumburai-hitihamii	9.25	1.75199	16.748	0.00641554
jayaweerai-gunasekarai	5	3.18439	6.81561	2.94853e-09		jayaweerai-gunawardanai	-2.875	-3.97407	-1.77593	1.0129e-08		TFL3	diff	lwr	upr	p adj		nanayakkarai-hitihamii	-19	-26.498	-11.502	2.13434e-08
kohukumburai-gunasekarai	4.625	2.80939	6.44061	1.88883e-08		kohukumburai-gunawardanai	-2.25	-3.34907	-1.15093	2.171e-06		gunasekarai-alwisi	-2.25	-3.86836	-0.631638	0.0014439		nilgala-hitihamii	37	29.502	44.498	5.89528e-14
nanayakkarai-gunasekarai	6.125	4.30939	7.94061	1.65921e-11		nanayakkarai-gunawardanai	-2.5	-3.59907	-1.40093	2.41157e-07		hitihamii-alwisi	-2.125	-3.74336	-0.506638	0.00303632		punctata-hitihamii	-58.75	-66.248	-51.252	5.86198e-14
nilgala-gunasekarai	5.875	4.05939	7.69061	4.98487e-11		nilgala-gunawardanai	-2.5	-3.59907	-1.40093	2.41157e-07		jayaweerai-alwisi	-2.125	-3.74336	-0.506638	0.00303632		rajakarunai-hitihamii	-62.75	-70.248	-55.252	5.86198e-14
punctata-gunasekarai	7.25	5.43439	9.06561	2.2693e-13		punctata-gunawardanai	-1.875	-2.97407	-0.775935	6.37137e-05		nanayakkarai-alwisi	-2.375	-3.99336	-0.756638	0.000678968		rammalensis-hitihamii	-50.5	-57.998	-43.002	5.86198e-14
rammalensis-gunasekarai	7.625	5.80939	9.44061	1.00808e-13		rajakarunai-gunawardanai	-2.5	-3.59907	-1.40093	2.41157e-07		nilgala-alwisi	-3.125	-4.74336	-1.50664	6.81006e-06		kohukumburai-jayaweerai	31	23.502	38.498	1.22347e-13
punctata-gunawardanai	2.375	0.559388	4.19061	0.00318317		rammalensis-gunawardanai	2.5	1.40093	3.59907	2.41157e-07		rammalensis-alwisi	2.125	0.506638	3.74336	0.00303632		nilgala-jayaweerai	58.75	51.252	66.248	5.86198e-14
rajakarunai-gunawardanai	-4.625	-6.44061	-2.80939	1.88883e-08		jayaweerai-hitihamii	-1.625	-2.72407	-0.525935	0.000609388		kohukumburai-gunasekarai	3.625	2.00664	5.24336	3.36005e-07		punctata-jayaweerai	-37	-44.498	-29.502	5.89528e-14
rammalensis-gunawardanai	2.75	0.934388	4.56561	0.000426827		nanayakkarai-hitihamii	-1.25	-2.34907	-0.150935	0.0154415		rammalensis-gunasekarai	4.375	2.75664	5.99336	4.61736e-09		rajakarunai-jayaweerai	-41	-48.498	-33.502	5.86198e-14
rajakarunai-hitihamii	-5.375	-7.19061	-3.55939	4.91227e-10		nilgala-hitihamii	-1.25	-2.34907	-0.150935	0.0154415		kohukumburai-gunawardanai	2.375	0.756638	3.99336	0.000678968		rammalensis-jayaweerai	-28.75	-36.248	-21.252	5.69766e-13
rammalensis-hitihamii	2	0.184388	3.81561	0.0211791		rajakarunai-hitihamii	-1.25	-2.34907	-0.150935	0.0154415		nanayakkarai-gunawardanai	-1.375	-2.99336	0.243362	0.155885		nanayakkarai-kohukumburai	-28.25	-35.748	-20.752	8.85736e-13
punctata-jayaweerai	2.25	0.434388	4.06561	0.00609014		rammalensis-hitihamii	3.75	2.65093	4.84907	1.22706e-11		nilgala-gunawardanai	-2.125	-3.74336	-0.506638	0.00303632		nilgala-kohukumburai	27.75	20.252	35.248	1.40843e-12
rajakarunai-jayaweerai	-4.75	-6.56561	-2.93439	1.00981e-08		rammalensis-jayaweerai	5.375	4.27593	6.47407	5.90639e-14		rammalensis-gunawardanai	3.125	1.50664	4.74336	6.81006e-06		punctata-kohukumburai	-68	-75.498	-60.502	5.86198e-14
rammalensis-jayaweerai	2.625	0.809388	4.44061	0.000840394		rammalensis-kohukumburai	4.75	3.65093	5.84907	7.80487e-14		kohukumburai-hitihamii	3.5	1.88164	5.11836	7.06169e-07		rajakarunai-kohukumburai	-72	-79.498	-64.502	5.86198e-14
punctata-kohukumburai	2.625	0.809388	4.44061	0.000840394		rammalensis-nanayakkarai	5	3.90093	6.09907	6.30607e-14		rammalensis-hitihamii	4.25	2.63164	5.86836	9.23265e-09		rammalensis-kohukumburai	-59.75	-67.248	-52.252	5.86198e-14
rajakarunai-kohukumburai	-4.375	-6.19061	-2.55939	6.74685e-08		rammalensis-nilgala	5	3.90093	6.09907	6.30607e-14		kohukumburai-jayaweerai	3.5	1.88164	5.11836	7.06169e-07		nilgala-nanayakkarai	56	48.502	63.498	5.86198e-14
rammalensis-kohukumburai	3	1.18439	4.81561	0.000108764		rammalensis-punctata	4.375	3.27593	5.47407	2.42695e-13		rammalensis-jayaweerai	4.25	2.63164	5.86836	9.23265e-09		punctata-nanayakkarai	-39.75	-47.248	-32.252	5.87308e-14
rajakarunai-nanayakkarai	-5.875	-7.69061	-4.05939	4.98487e-11		rammalensis-rajakarunai	5	3.90093	6.09907	6.30607e-14		nanayakkarai-kohukumburai	-3.75	-5.36836	-2.13164	1.61067e-07		rajakarunai-nanayakkarai	-43.75	-51.248	-36.252	5.86198e-14
rajakarunai-nilgala	-5.625	-7.44061	-3.80939	1.5424e-10								nilgala-kohukumburai	-4.5	-6.11836	-2.88164	2.33022e-09		rammalensis-nanayakkarai	-31.5	-38.998	-24.002	1.00364e-13
rajakarunai-punctata	-7	-8.81561	-5.18439	4.9738e-13		TFL2	diff	lwr	upr	p adj		punctata-kohukumburai	-2.125	-3.74336	-0.506638	0.00303632		punctata-nilgala	-95.75	-103.248	-88.252	5.86198e-14
rammalensis-rajakarunai	7.375	5.55939	9.19061	1.62759e-13		gunasekarai-alwisi	-2.25	-3.86836	-0.631638	0.0014439		rajakarunai-kohukumburai	-2.75	-4.36836	-1.13164	6.81455e-05		rajakarunai-nilgala	-99.75	-107.248	-92.252	5.86198e-14
						hitihamii-alwisi	-2.125	-3.74336	-0.506638	0.00303632		punctata-nanayakkarai	1.625	0.00663827	3.24336	0.0483545		rammalensis-nilgala	-87.5	-94.998	-80.002	5.86198e-14
TLF5	diff	lwr	upr	p adj		jayaweerai-alwisi	-2.125	-3.74336	-0.506638	0.00303632		rammalensis-nanayakkarai	4.5	2.88164	6.11836	2.33022e-09		rammalensis-punctata	8.25	0.751985	15.748	0.0214148
gunasekarai-alwisi	-1.5	-2.65906	-0.340942	0.00363419		nanayakkarai-alwisi	-2.375	-3.99336	-0.756638	0.000678968		punctata-nilgala	2.375	0.756638	3.99336	0.000678968		rammalensis-rajakarunai	12.25	4.75199	19.748	0.00013086
kohukumburai-alwisi	7.5	6.34094	8.65906	5.86198e-14		nilgala-alwisi	-3.125	-4.74336	-1.50664	6.81006e-06		rajakarunai-nilgala	1.75	0.131638	3.36836	0.0252476
nanayakkarai-alwisi	-2.5	-3.65906	-1.34094	7.46571e-07		rammalensis-alwisi	2.125	0.506638	3.74336	0.00303632		rammalensis-nilgala	5.25	3.63164	6.86836	4.66485e-11		TFL4	diff	lwr	upr	p adj
rammalensis-alwisi	5	3.84094	6.15906	7.88258e-14		kohukumburai-gunasekarai	3.625	2.00664	5.24336	3.36005e-07		rammalensis-punctata	2.875	1.25664	4.49336	3.156e-05		gunawardanai-alwisi	3.75	2.12121	5.37879	1.85393e-07
gunawardanai-gunasekarai	2	0.840942	3.15906	5.2435e-05		rammalensis-gunasekarai	4.375	2.75664	5.99336	4.61736e-09		rammalensis-rajakarunai	3.5	1.88164	5.11836	7.06169e-07		hitihamii-alwisi	2.125	0.496208	3.75379	0.00328944
hitihamii-gunasekarai	1.75	0.590942	2.90906	0.000447523		kohukumburai-gunawardanai	2.375	0.756638	3.99336	0.000678968								kohukumburai-alwisi	5.125	3.49621	6.75379	1.03381e-10
kohukumburai-gunasekarai	9	7.84094	10.1591	5.86198e-14		nilgala-gunawardanai	-2.125	-3.74336	-0.506638	0.00303632		TLT2	diff	lwr	upr	p adj		punctata-alwisi	2	0.371208	3.62879	0.0067679
punctata-gunasekarai	2.5	1.34094	3.65906	7.46571e-07		punctata-gunawardanai	0.25	-1.36836	1.86836	0.999975		gunasekarai-alwisi	-2.5	-3.80995	-1.19005	8.50649e-06		rammalensis-alwisi	6	4.37121	7.62879	1.59295e-12
rajakarunai-gunasekarai	1.375	0.215942	2.53406	0.00992503		rajakarunai-gunawardanai	-0.375	-1.99336	1.24336	0.999072		jayaweerai-alwisi	-2.375	-3.68495	-1.06505	2.19316e-05		gunawardanai-gunasekarai	3.25	1.62121	4.87879	3.61017e-06
rammalensis-gunasekarai	6.5	5.34094	7.65906	5.86198e-14		rammalensis-gunawardanai	3.125	1.50664	4.74336	6.81006e-06		nilgala-alwisi	-1.75	-3.05995	-0.440054	0.00243975		hitihamii-gunasekarai	1.625	-0.00379166	3.25379	0.050956
kohukumburai-gunawardanai	7	5.84094	8.15906	5.86198e-14		kohukumburai-hitihamii	3.5	1.88164	5.11836	7.06169e-07		rammalensis-alwisi	4	2.69005	5.30995	2.23691e-10		kohukumburai-gunasekarai	4.625	2.99621	6.25379	1.39136e-09
nanayakkarai-gunawardanai	-3	-4.15906	-1.84094	1.30027e-08		rammalensis-hitihamii	4.25	2.63164	5.86836	9.23265e-09		gunawardanai-gunasekarai	3	1.69005	4.30995	2.08068e-07		rammalensis-gunasekarai	5.5	3.87121	7.12879	1.61772e-11
nilgala-gunawardanai	-1.5	-2.65906	-0.340942	0.00363419		kohukumburai-jayaweerai	3.5	1.88164	5.11836	7.06169e-07		hitihamii-gunasekarai	2.375	1.06505	3.68495	2.19316e-05		jayaweerai-gunawardanai	-4.375	-6.00379	-2.74621	5.38888e-09
rammalensis-gunawardanai	4.5	3.34094	5.65906	4.21774e-13		rammalensis-jayaweerai	4.25	2.63164	5.86836	9.23265e-09		kohukumburai-gunasekarai	3.75	2.44005	5.05995	1.13757e-09		nanayakkarai-gunawardanai	-3.625	-5.25379	-1.99621	3.85486e-07
kohukumburai-hitihamii	7.25	6.09094	8.40906	5.86198e-14		nanayakkarai-kohukumburai	-3.75	-5.36836	-2.13164	1.61067e-07		nanayakkarai-gunasekarai	1.375	0.065054	2.68495	0.0331015		nilgala-gunawardanai	-2.875	-4.50379	-1.24621	3.53467e-05
nanayakkarai-hitihamii	-2.75	-3.90906	-1.59094	9.54594e-08		nilgala-kohukumburai	-4.5	-6.11836	-2.88164	2.33022e-09		punctata-gunasekarai	2.75	1.44005	4.05995	1.30538e-06		punctata-gunawardanai	-1.75	-3.37879	-0.121208	0.0268003
nilgala-hitihamii	-1.25	-2.40906	-0.0909422	0.0258826		punctata-kohukumburai	-2.125	-3.74336	-0.506638	0.00303632		rajakarunai-gunasekarai	2.375	1.06505	3.68495	2.19316e-05		rajakarunai-gunawardanai	-2.25	-3.87879	-0.621208	0.00157407
rammalensis-hitihamii	4.75	3.59094	5.90906	1.39444e-13		rajakarunai-kohukumburai	-2.75	-4.36836	-1.13164	6.81455e-05		rammalensis-gunasekarai	6.5	5.19005	7.80995	5.89528e-14		rammalensis-gunawardanai	2.25	0.621208	3.87879	0.00157407
kohukumburai-jayaweerai	8	6.84094	9.15906	5.86198e-14		punctata-nanayakkarai	1.625	0.00663827	3.24336	0.0483545		jayaweerai-gunawardanai	-2.875	-4.18495	-1.56505	5.18344e-07		jayaweerai-hitihamii	-2.75	-4.37879	-1.12121	7.59526e-05
nanayakkarai-jayaweerai	-2	-3.15906	-0.840942	5.2435e-05		rammalensis-nanayakkarai	4.5	2.88164	6.11836	2.33022e-09		nanayakkarai-gunawardanai	-1.625	-2.93495	-0.315054	0.00601918		kohukumburai-hitihamii	3	1.37121	4.62879	1.64702e-05
punctata-jayaweerai	1.5	0.340942	2.65906	0.00363419		punctata-nilgala	2.375	0.756638	3.99336	0.000678968		nilgala-gunawardanai	-2.25	-3.55995	-0.940054	5.67376e-05		nanayakkarai-hitihamii	-2	-3.62879	-0.371208	0.0067679
rammalensis-jayaweerai	5.5	4.34094	6.65906	6.01741e-14		rajakarunai-nilgala	1.75	0.131638	3.36836	0.0252476		rammalensis-gunawardanai	3.5	2.19005	4.80995	6.11776e-09		rammalensis-hitihamii	3.875	2.24621	5.50379	8.98512e-08
nanayakkarai-kohukumburai	-10	-11.1591	-8.84094	5.86198e-14		rammalensis-nilgala	5.25	3.63164	6.86836	4.66485e-11		jayaweerai-hitihamii	-2.25	-3.55995	-0.940054	5.67376e-05		kohukumburai-jayaweerai	5.75	4.12121	7.37879	4.93949e-12
nilgala-kohukumburai	-8.5	-9.65906	-7.34094	5.86198e-14		rammalensis-punctata	2.875	1.25664	4.49336	3.156e-05		nilgala-hitihamii	-1.625	-2.93495	-0.315054	0.00601918		punctata-jayaweerai	2.625	0.996208	4.25379	0.00016312
punctata-kohukumburai	-6.5	-7.65906	-5.34094	5.86198e-14		rammalensis-rajakarunai	3.5	1.88164	5.11836	7.06169e-07		rammalensis-hitihamii	4.125	2.81505	5.43495	1.01292e-10		rajakarunai-jayaweerai	2.125	0.496208	3.75379	0.00328944
rajakarunai-kohukumburai	-7.625	-8.78406	-6.46594	5.86198e-14								kohukumburai-jayaweerai	3.625	2.31505	4.93495	2.61973e-09		rammalensis-jayaweerai	6.625	4.99621	8.25379	1.58762e-13
rammalensis-kohukumburai	-2.5	-3.65906	-1.34094	7.46571e-07		TLT1	diff	lwr	upr	p adj		punctata-jayaweerai	2.625	1.31505	3.93495	3.31904e-06		nanayakkarai-kohukumburai	-5	-6.62879	-3.37121	1.95356e-10
nilgala-nanayakkarai	1.5	0.340942	2.65906	0.00363419		gunawardanai-alwisi	4.5	3.17719	5.82281	1.32807e-11		rajakarunai-jayaweerai	2.25	0.940054	3.55995	5.67376e-05		nilgala-kohukumburai	-4.25	-5.87879	-2.62121	1.07488e-08
punctata-nanayakkarai	3.5	2.34094	4.65906	2.97324e-10		hitihamii-alwisi	2	0.67719	3.32281	0.000438399		rammalensis-jayaweerai	6.375	5.06505	7.68495	5.92859e-14		punctata-kohukumburai	-3.125	-4.75379	-1.49621	7.69562e-06
rajakarunai-nanayakkarai	2.375	1.21594	3.53406	2.13135e-06		punctata-alwisi	1.75	0.42719	3.07281	0.0027629		nanayakkarai-kohukumburai	-2.375	-3.68495	-1.06505	2.19316e-05		rajakarunai-kohukumburai	-3.625	-5.25379	-1.99621	3.85486e-07
rammalensis-nanayakkarai	7.5	6.34094	8.65906	5.86198e-14		rammalensis-alwisi	4.875	3.55219	6.19781	1.57419e-12		nilgala-kohukumburai	-3	-4.30995	-1.69005	2.08068e-07		punctata-nanayakkarai	1.875	0.246208	3.50379	0.0136439
punctata-nilgala	2	0.840942	3.15906	5.2435e-05		gunawardanai-gunasekarai	3.875	2.55219	5.19781	6.40506e-10		rajakarunai-kohukumburai	-1.375	-2.68495	-0.065054	0.0331015		rammalensis-nanayakkarai	5.875	4.24621	7.50379	2.78022e-12
rammalensis-nilgala	6	4.84094	7.15906	5.87308e-14		hitihamii-gunasekarai	1.375	0.05219	2.69781	0.0360755		rammalensis-kohukumburai	2.75	1.44005	4.05995	1.30538e-06		rammalensis-nilgala	5.125	3.49621	6.75379	1.03381e-10
rajakarunai-punctata	-1.125	-2.28406	0.0340578	0.0633282		jayaweerai-gunasekarai	-1.875	-3.19781	-0.55219	0.00110881		rammalensis-nanayakkarai	5.125	3.81505	6.43495	3.5294e-13		rammalensis-punctata	4	2.37121	5.62879	4.39e-08
rammalensis-punctata	4	2.84094	5.15906	9.05143e-12		rammalensis-gunasekarai	4.25	2.92719	5.57281	6.00586e-11		punctata-nilgala	2	0.690054	3.30995	0.00037856		rammalensis-rajakarunai	4.5	2.87121	6.12879	2.72591e-09
rammalensis-rajakarunai	5.125	3.96594	6.28406	6.85008e-14		hitihamii-gunawardanai	-2.5	-3.82281	-1.17719	1.0223e-05		rajakarunai-nilgala	1.625	0.315054	2.93495	0.00601918
						jayaweerai-gunawardanai	-5.75	-7.07281	-4.42719	7.4718e-14		rammalensis-nilgala	5.75	4.44005	7.05995	7.07212e-14		TLT3	diff	lwr	upr	p adj
TLT4	diff	lwr	upr	p adj		kohukumburai-gunawardanai	-3.375	-4.69781	-2.05219	1.82039e-08		rammalensis-punctata	3.75	2.44005	5.05995	1.13757e-09		gunasekarai-alwisi	-1.5	-2.9607	-0.039295	0.0400665
gunawardanai-alwisi	2.5	0.420634	4.57937	0.00857389		nanayakkarai-gunawardanai	-3.75	-5.07281	-2.42719	1.44891e-09		rammalensis-rajakarunai	4.125	2.81505	5.43495	1.01292e-10		gunawardanai-alwisi	3.125	1.6643	4.5857	8.84755e-07
kohukumburai-alwisi	4.125	2.04563	6.20437	4.04521e-06		nilgala-gunawardanai	-4.125	-5.44781	-2.80219	1.30424e-10								jayaweerai-alwisi	-1.5	-2.9607	-0.039295	0.0400665
nanayakkarai-alwisi	-2.25	-4.32937	-0.170634	0.0250911		punctata-gunawardanai	-2.75	-4.07281	-1.42719	1.59263e-06		TLT5	diff	lwr	upr	p adj		kohukumburai-alwisi	2	0.539295	3.4607	0.00177111
nilgala-alwisi	-2.5	-4.57937	-0.420634	0.00857389		rajakarunai-gunawardanai	-3.875	-5.19781	-2.55219	6.40506e-10		gunasekarai-alwisi	1.875	0.19503	3.55497	0.0186416		nilgala-alwisi	-2	-3.4607	-0.539295	0.00177111
rammalensis-alwisi	3.125	1.04563	5.20437	0.00047947		jayaweerai-hitihamii	-3.25	-4.57281	-1.92719	4.34611e-08		gunawardanai-alwisi	1.875	0.19503	3.55497	0.0186416		punctata-alwisi	2.25	0.789295	3.7107	0.000330979
gunawardanai-gunasekarai	2.5	0.420634	4.57937	0.00857389		nilgala-hitihamii	-1.625	-2.94781	-0.30219	0.00673398		hitihamii-alwisi	3.125	1.44503	4.80497	1.37337e-05		rajakarunai-alwisi	1.75	0.289295	3.2107	0.00891399
kohukumburai-gunasekarai	4.125	2.04563	6.20437	4.04521e-06		rajakarunai-hitihamii	-1.375	-2.69781	-0.05219	0.0360755		kohukumburai-alwisi	6.75	5.07003	8.42997	2.00506e-13		rammalensis-alwisi	5.25	3.7893	6.7107	3.05644e-12
nanayakkarai-gunasekarai	-2.25	-4.32937	-0.170634	0.0250911		rammalensis-hitihamii	2.875	1.55219	4.19781	6.36714e-07		nanayakkarai-alwisi	2	0.32003	3.67997	0.00955245		gunawardanai-gunasekarai	4.625	3.1643	6.0857	8.78707e-11
nilgala-gunasekarai	-2.5	-4.57937	-0.420634	0.00857389		kohukumburai-jayaweerai	2.375	1.05219	3.69781	2.61377e-05		nilgala-alwisi	-2.375	-4.05497	-0.69503	0.00114978		hitihamii-gunasekarai	2.625	1.1643	4.0857	2.57102e-05
rammalensis-gunasekarai	3.125	1.04563	5.20437	0.00047947		nanayakkarai-jayaweerai	2	0.67719	3.32281	0.000438399		punctata-alwisi	1.5	-0.17997	3.17997	0.114631		kohukumburai-gunasekarai	3.5	2.0393	4.9607	7.65866e-08
jayaweerai-gunawardanai	-4.375	-6.45437	-2.29563	1.24723e-06		nilgala-jayaweerai	1.625	0.30219	2.94781	0.00673398		rajakarunai-alwisi	2.875	1.19503	4.55497	6.0408e-05		punctata-gunasekarai	3.75	2.2893	5.2107	1.57492e-08
nanayakkarai-gunawardanai	-4.75	-6.82937	-2.67063	2.19909e-07		punctata-jayaweerai	3	1.67719	4.32281	2.57205e-07		rammalensis-alwisi	7.75	6.07003	9.42997	6.17284e-14		rajakarunai-gunasekarai	3.25	1.7893	4.7107	3.87796e-07
nilgala-gunawardanai	-5	-7.07937	-2.92063	7.07476e-08		rajakarunai-jayaweerai	1.875	0.55219	3.19781	0.00110881		hitihamii-gunasekarai	1.25	-0.42997	2.92997	0.304289		rammalensis-gunasekarai	6.75	5.2893	8.2107	6.16174e-14
punctata-gunawardanai	-2.125	-4.20437	-0.0456337	0.0417497		rammalensis-jayaweerai	6.125	4.80219	7.44781	6.15064e-14		jayaweerai-gunasekarai	-1.75	-3.42997	-0.0700297	0.0354053		hitihamii-gunawardanai	-2	-3.4607	-0.539295	0.00177111
jayaweerai-hitihamii	-3.625	-5.70437	-1.54563	4.39194e-05		rammalensis-kohukumburai	3.75	2.42719	5.07281	1.44891e-09		kohukumburai-gunasekarai	4.875	3.19503	6.55497	8.11339e-10		jayaweerai-gunawardanai	-4.625	-6.0857	-3.1643	8.78707e-11
kohukumburai-hitihamii	2.375	0.295634	4.45437	0.0147878		rammalensis-nanayakkarai	4.125	2.80219	5.44781	1.30424e-10		nilgala-gunasekarai	-4.25	-5.92997	-2.57003	2.21808e-08		nanayakkarai-gunawardanai	-3.75	-5.2107	-2.2893	1.57492e-08
nanayakkarai-hitihamii	-4	-6.07937	-1.92063	7.31979e-06		punctata-nilgala	1.375	0.05219	2.69781	0.0360755		rammalensis-gunasekarai	5.875	4.19503	7.55497	6.35569e-12		nilgala-gunawardanai	-5.125	-6.5857	-3.6643	5.82312e-12
nilgala-hitihamii	-4.25	-6.32937	-2.17063	2.2423e-06		rammalensis-nilgala	4.5	3.17719	5.82281	1.32807e-11		hitihamii-gunawardanai	1.25	-0.42997	2.92997	0.304289		rammalensis-gunawardanai	2.125	0.664295	3.5857	0.000769553
kohukumburai-jayaweerai	6	3.92063	8.07937	9.34084e-10		rammalensis-punctata	3.125	1.80219	4.44781	1.05089e-07		jayaweerai-gunawardanai	-1.75	-3.42997	-0.0700297	0.0354053		jayaweerai-hitihamii	-2.625	-4.0857	-1.1643	2.57102e-05
punctata-jayaweerai	2.25	0.170634	4.32937	0.0250911		rammalensis-rajakarunai	4.25	2.92719	5.57281	6.00586e-11		kohukumburai-gunawardanai	4.875	3.19503	6.55497	8.11339e-10		nanayakkarai-hitihamii	-1.75	-3.2107	-0.289295	0.00891399
rajakarunai-jayaweerai	2.5	0.420634	4.57937	0.00857389								nilgala-gunawardanai	-4.25	-5.92997	-2.57003	2.21808e-08		nilgala-hitihamii	-3.125	-4.5857	-1.6643	8.84755e-07
rammalensis-jayaweerai	5	2.92063	7.07937	7.07476e-08		VS	diff	lwr	upr	p adj		rammalensis-gunawardanai	5.875	4.19503	7.55497	6.35569e-12		rammalensis-hitihamii	4.125	2.6643	5.5857	1.59331e-09
nanayakkarai-kohukumburai	-6.375	-8.45437	-4.29563	2.01857e-10		gunasekarai-alwisi	-7.75	-11.6856	-3.81442	4.66899e-06		jayaweerai-hitihamii	-3	-4.67997	-1.32003	2.87805e-05		kohukumburai-jayaweerai	3.5	2.0393	4.9607	7.65866e-08
nilgala-kohukumburai	-6.625	-8.70437	-4.54563	7.47248e-11		hitihamii-alwisi	-7.25	-11.1856	-3.31442	1.64192e-05		kohukumburai-hitihamii	3.625	1.94503	5.30497	7.40448e-07		punctata-jayaweerai	3.75	2.2893	5.2107	1.57492e-08
punctata-kohukumburai	-3.75	-5.82937	-1.67063	2.4134e-05		jayaweerai-alwisi	-6	-9.93558	-2.06442	0.000386991		nilgala-hitihamii	-5.5	-7.17997	-3.82003	3.66746e-11		rajakarunai-jayaweerai	3.25	1.7893	4.7107	3.87796e-07
rajakarunai-kohukumburai	-3.5	-5.57937	-1.42063	7.99636e-05		kohukumburai-alwisi	-5.25	-9.18558	-1.31442	0.00248576		rammalensis-hitihamii	4.625	2.94503	6.30497	2.97122e-09		rammalensis-jayaweerai	6.75	5.2893	8.2107	6.16174e-14
punctata-nanayakkarai	2.625	0.545634	4.70437	0.00490411		nanayakkarai-alwisi	-2.75	-6.68558	1.18558	0.389299		kohukumburai-jayaweerai	6.625	4.94503	8.30497	2.97318e-13		nanayakkarai-kohukumburai	-2.625	-4.0857	-1.1643	2.57102e-05
rajakarunai-nanayakkarai	2.875	0.795634	4.95437	0.00155526		nilgala-alwisi	-10.25	-14.1856	-6.31442	1.12317e-08		nanayakkarai-jayaweerai	1.875	0.19503	3.55497	0.0186416		nilgala-kohukumburai	-4	-5.4607	-2.5393	3.38158e-09
rammalensis-nanayakkarai	5.375	3.29563	7.45437	1.34092e-08		punctata-alwisi	-5.5	-9.43558	-1.56442	0.00134623		nilgala-jayaweerai	-2.5	-4.17997	-0.82003	0.00055447		rammalensis-kohukumburai	3.25	1.7893	4.7107	3.87796e-07
punctata-nilgala	2.875	0.795634	4.95437	0.00155526		gunawardanai-gunasekarai	4.75	0.814421	8.68558	0.00821509		rajakarunai-jayaweerai	2.75	1.07003	4.42997	0.000126796		punctata-nanayakkarai	2.875	1.4143	4.3357	4.71461e-06
rajakarunai-nilgala	3.125	1.04563	5.20437	0.00047947		nanayakkarai-gunasekarai	5	1.06442	8.93558	0.00454626		rammalensis-jayaweerai	7.625	5.94503	9.30497	6.32827e-14		rajakarunai-nanayakkarai	2.375	0.914295	3.8357	0.00014148
rammalensis-nilgala	5.625	3.54563	7.70437	4.54388e-09		rajakarunai-gunasekarai	6.5	2.56442	10.4356	0.000109565		nanayakkarai-kohukumburai	-4.75	-6.42997	-3.07003	1.54603e-09		rammalensis-nanayakkarai	5.875	4.4143	7.3357	1.96398e-13
rammalensis-punctata	2.75	0.670634	4.82937	0.00277409		rammalensis-gunasekarai	5.75	1.81442	9.68558	0.000723751		nilgala-kohukumburai	-9.125	-10.805	-7.44503	5.86198e-14		punctata-nilgala	4.25	2.7893	5.7107	7.59225e-10
rammalensis-rajakarunai	2.5	0.420634	4.57937	0.00857389		hitihamii-gunawardanai	-4.25	-8.18558	-0.314421	0.0255654		punctata-kohukumburai	-5.25	-6.92997	-3.57003	1.234e-10		rajakarunai-nilgala	3.75	2.2893	5.2107	1.57492e-08
						nilgala-gunawardanai	-7.25	-11.1856	-3.31442	1.64192e-05		rajakarunai-kohukumburai	-3.875	-5.55497	-2.19503	1.78036e-07		rammalensis-nilgala	7.25	5.7893	8.7107	5.89528e-14
						nanayakkarai-hitihamii	4.5	0.564421	8.43558	0.0146247		nilgala-nanayakkarai	-4.375	-6.05497	-2.69503	1.12554e-08		rammalensis-punctata	3	1.5393	4.4607	2.0351e-06
						rajakarunai-hitihamii	6	2.06442	9.93558	0.000386991		rammalensis-nanayakkarai	5.75	4.07003	7.42997	1.12887e-11		rammalensis-rajakarunai	3.5	2.0393	4.9607	7.65866e-08
						rammalensis-hitihamii	5.25	1.31442	9.18558	0.00248576		punctata-nilgala	3.875	2.19503	5.55497	1.78036e-07
						nilgala-jayaweerai	-4.25	-8.18558	-0.314421	0.0255654		rajakarunai-nilgala	5.25	3.57003	6.92997	1.234e-10
						rajakarunai-jayaweerai	4.75	0.814421	8.68558	0.00821509		rammalensis-nilgala	10.125	8.44503	11.805	5.86198e-14
						rammalensis-jayaweerai	4	0.0644207	7.93558	0.0437205		rammalensis-punctata	6.25	4.57003	7.92997	1.23135e-12
						nilgala-kohukumburai	-5	-8.93558	-1.06442	0.00454626		rammalensis-rajakarunai	4.875	3.19503	6.55497	8.11339e-10
						rajakarunai-kohukumburai	4	0.0644207	7.93558	0.0437205
						nilgala-nanayakkarai	-7.5	-11.4356	-3.56442	8.74419e-06
						punctata-nilgala	4.75	0.814421	8.68558	0.00821509
						rajakarunai-nilgala	9	5.06442	12.9356	2.14783e-07
						rammalensis-nilgala	8.25	4.31442	12.1856	1.34487e-06
						rajakarunai-punctata	4.25	0.314421	8.18558	0.0255654
